# Supplementary material for: Cloning of a new HSP70 gene from western flowerthrips, Frankliniella occidentalis, and expression patterns during thermal stress
Source: PeerJ journal article supplement (doi:10.7717/peerj.7687), 2019-09-25
Supplement: Fig.S1.pdf [file Fig.S1.pdf]

-159 ACATGGGGAGTTTTGATACAGCGATCACAGCGACCAGCGCAAGCGACAACCGGAAGTCTAGCGACTTTCTCTGT  
 -84 GCGTGAACGTGAACGCGAGTTTTCTAAGTGCGAAGTGCAGTTTTTCTCCGAGTTCAGTGAACCTAAGTCTCAATCTC  
 -9 AGCACCAAG  
 1 ATGCCAGCCGTGGGAATCGACTTGGGCACCACCTACTCCTGCGTGGGCGTGTGGCAGCAGGGCAAGGTGGAGATC  
 1 M P A V G I D L G T T Y S C V G V W Q Q G K V E I  
 76 ATCGCCAACGACCAGGGCAACCGCACCACCCCGAGTATGTGGCCTTACCGACACCGAGAGGCTGATCGGCGAC  
 26 I A N D Q G N R T T P S Y V A F T D T E R L I G D  
 151 GCGGCCAAGAACCAGACCGCCATGAACCCCAAGGACACCGTGTTCGACGCCAAGCGACTCATCGGGCGGCGCTTC  
 51 A A K N Q T A M N P K D T V F D A K R L I G R R F  
 226 GACGACCCCAAGATCCAGGCCGACATCAAGCAGTGGCCCTTACGCGTCATCAGCGACAGCGGCAAGCCCAAGATC  
 76 D D P K I Q A D I K Q T W P F S V I S D S G K P K I  
 301 CAGGTACGTTCAAGGGCAGCGCAAGGTGTTCSCCCGAGGAGATCAGTCCATGGTGTGACGAAGATGAAG  
 101 Q V T F K G E R K V F S P E E I S S M V L T K M K  
 376 GAGACGGCCGAGGCGTACCTGGGCAGCACGGTCCGGGACGCGGTGGTCACCGTGCCCGCTACTTCAACGACAGC  
 126 E T A E A Y L G S T V R D A V V T V P A Y F N D S  
 451 CAGCGCCAGGCCACCAAGGACGCGGGCGTCATCGCGGGGCTCAACGTCATGAGGATCATCAACGAGCCACGCCC  
 151 Q R Q A T K D A G V I A G L N V M R I I N E P T A  
 526 GCGGCGTTGGCCTACGGCCTGGACAAGAACCTCAAGGGCAGCGCAACGTGCTCATCTTCGACCTGGGCGGCGGC  
 176 A A L A Y G L D K N L G G E R N V L I F G D L G G G G  
 601 ACCTTCGACGTGTCTGCTCTCCATCGACGAGGCTCCCTGTTTCGAGGTCAAGTCGACGCGCGGACACGAC  
 201 T F D V S V L S I D E G S L F E V K S T A G D T H  
 676 CTGGGCGGCGAGGACTTTGACAGCCGGCTCGTCAACCACCTGGCCGAGGAGTTCAAGCGCAAATACAAGAAGGAC  
 226 L G G E D F D S R L V N H L A E E F K R K Y K K D  
 751 GTGACGAGCAACCCCGCGCCCTGCGTGCCTGCGCACCGCGGGAGCGCGCAAGCGCACGCTGTGCTCCAGC  
 251 V T S N P R A L R R L R T A A E R A K R T L S S S  
 826 ACCGAGGCCAACATCGAGATCGACGCGCTGTACGAGGGCATCGACTTCTACACCAAGGTGTCCCGGGCCCGCTTC  
 276 T E A N I E I D A L Y E G I D F Y T K V S R A A R F  
 901 GAGGAGCTGTGCGGCTGTTCGCGCCACGTCACCCCGTCGAGCGCGCTGCAGGACGCGCAAGATGAGC  
 301 E E L C A D L F R A T L T P V E R A L Q D A K M S  
 976 AAGAGCGACATCCACGACGTGGTCTGGTGGGCGGCTCCACGCGCATCCCCAAGGTCCAGAGCCTGCTGCAGAAC  
 326 K S D I H D V V L V G G S T R I P K V Q S L L Q N  
 1051 TTCTTCTGCGGCAAGTCCCTCAACCTGTCCATCAACCCGACGAGGCCGTTGGCGTACGGCGCGGCCGCTGCAGGCC  
 351 F F C G K S L N L S I N P D E A V A Y G A A V Q A  
 1126 GCCATCCTGTCCGGCGACCAGAGCGAGGCCATCCAGGACGTGCTGCTGGTGGACGTGGCGCCGCTGTGCTCGGC  
 376 A I L S G D Q S E A I Q D V L L V D V A P L S L G  
 1201 ATCGAGACGGCGGGCGGCTCATGACCAAGATCATCGAGCGCAACGCCGATCCCGTGAAGCAGCAGCGCAGACC  
 401 I E T A G G V M T K I I E R N S R I P C K Q T Q T  
 1276 TTCTCGACGTACGCCACAACCAGCCGGCCGTCACCATCCAGGTGTTCGAGGGCGAGCGGCCATGACCAAGGAC  
 426 F S T Y A D N Q P A V T I Q V F E G E R A M T K D  
 1351 AACAAACCGCCTGGGCACCTTCGACCTGACGGGCATCCCGCCCGCCCTCGCGGCGTCCCAAGATCGAGGTCAAC  
 451 N N R L G T F D L T G I P P A P R G V P K I E V T  
 1426 TTTGACCTGGACGCCAACGGCATCCTCAACGTGCGCCGCAAGGACACGAGCTCGGGCCGCTCCCAGAACATCACC  
 476 F D A L D A A N G G I L N V A A K D T S S G R S Q N I T  
 1501 ATCAAGAAGCAAGGCCGCTCTCGCCGACGAGATCCAGCGCATGGTGGACGAGGCGGAGCGGTACAAGGCC  
 501 I K N D K G R L S A D E I Q R M V D E A E R Y K A  
 1576 GAGGACGACCAGCAGCGCGACCGCGTGCAGCGCGCAACCAGCTGGAGGGCTACGTGTTACAGCATCAAGCAGGCC  
 526 E D D Q Q R D R V A A R N Q L E G Y V F S I K Q A  
 1651 ATCGACGAGGCCGCGACAAGCTCCCGGAGCAGGACAAGACCAGGGCGCGGAGGAGTGCAGGGCGACGCTGCGC  
 551 I D E A G D K L P E Q D K T R A R E E C E A T L R  
 1726 TGGCTGGACAGCAACACCTGGCCGACAAGGAGGAGTACGAGCACCGCCTCAAGGAGCTGCAGCAGAAGGTGCAG  
 576 W L D S N T L A D K E E Y E H R L K E L Q Q K V Q  
 1801 GAGTTCATGGTGCCTGCCTGACTCGGGCGGCGGCGCGTACAGCCCCAGGCACCCAGGGCTGCGGGCAGCAG  
 601 E V M V R L H S G G P G A S Q P Q A P Q G C G Q Q  
 1876 GCTGGCAGGCACAACGGCCCCACCGTTCGAGGAGTTCGACTAAACCAACCCAGTCATTAGTGTGATAAAGACTTTA  
 626 A G R H N G P T V E E V D \*  
 1951 CTACAAGTGAGATTCTGGTGTATATTTCTGTGTGAACATGATTGTTAGTTGCAGTATTTCTTAAATTCCAAAGAC  
 2026 GTGTGTAAGTGTGTATCTATATTTAAGTTTAGGTTGAATGTTATGTGTTTACATAATTTATTGGTTTCTGCATTA  
 2101 GCAGTGTGCCATGTTGACTGATTAATTTGTTAATTTAAGTTTAGATAGCAAATGTTTTTCTTGTATGAATTTGATC  
 2176 TCTTAATCTTGTTTCCCTGTTGAATTTGATGATGATGATGATGATGATGATGATGATGATGATGATGATGATGATG  
 2251 AAAAAATTAGGTGATATTTTTTAAACCTAAGTGTGATTTCCCTTTTCGCTTCTTATAACCAACAACAACCA  
 2326 GATCAAAAAACTATTTTTCTCAAATCAGTGTACATACACAGAAAAGTTTTACCTTTGAACTCTTGACTGCATTTTC  
 2401 TTTTACCAAAGCATTTTCACACTGTCAACAATAATTGAAAACAAACCACTGTTTTACACGGAAATAACACTAACA  
 2476 GTTTTATTACTCACCTATGAGCCAGGTATTGAATACAACATCACCCCACTTTTTAACGCAATATTGATAGACC  
 2551 TTGTTTTGCTTTTTTGTATTGAATAACACAAGAGAAATGGGAGAAGTAAAGATACAAATTACAAGGTAGGAAGGC  
 2626 TCAATATTTGCTTGTTCATAACATTTATCCAATTAAATATTTTTGTTTTGCGATTTTGTCTTTTACGAACAT  
 2701 TACAGAATTTAAAGGACCCATAAAAGGAGCAGTGAACCTGAGTTCGGTGTGAGGCCTTTTCTCAAGGGCCTAATCT  
 2776 GACACCATCAAGCATGTTTCAAATGTGTCGCGATGTTTCGCGCGCCGACAGCAGCGCTTTAGCGGCGACAGTTG

2851 GAAATCTCCACCTCCACTTAGCAGACAGTCAAACCTAACTTCCCCTTTACTTTTGTTCCTCAGCGTTATGAGTACA  
2926 TTCAGACTTAATATGTTTTATGTTCTTCAATTTTTATTTGGTCACGGTTTTGTGCTCCGAGGACTTTATTTTCAGGGAC  
3001 ATGAAACAGACATAAATGACTGATCATGAGCAGTACAAAAATAAAAAATTTCTTGAACAGCCCTAGAACTTCAGAA  
3076 CTTCAGGAACTTTGGACCCGAAAACTTCTGCATCAACGCTAAACCATGAGAAAATTAATTTTTGTTATGTTAATC  
3151 GGGGAAACTGAAAGGGAAACACACAGTTTCCTCGTTTGACCCCTCCTCTACTCAAGTTGTTCTCTTTCTTAGAAGG  
3226 CGTGTGCTCGATTCTTCCATGCATCGTCGAAAGATCGGCTCCTGTTACCAGTCCCCTAACAGATGTACGTCTCCT  
3301 GAGAACTTGTAACAAACAAAGACGCAACGAAACTCGTCAGGGGAGGGCTTTGTCTCAAGTTTGAAGTTTTGTA  
3376 TGCTACTTGTGCAATCTACATTTATAGAAAATTTACTTTTAACTCAGCTTACCATTGAACAGACGACATGCATAA  
3451 ACGAAGAAGTAGAGACAAGAATGACGTACAACCATCTGACACCAACATGATGTGCGTGGTTCCGAAGCAAAACGT  
3526 AGAAAGTAAGCCGTCTAACCTAACTATCAGATTGTCAATTAGTGTGAGTTAATAAAAAATGGAAATTTTCTACCC  
3601 AAAAAAAAAAAAAAAAAAAAAAAAAAAAAAAAAA
